# Supplementary material for: Probing the spectral response of a new class of bioactive pyrazoline derivative in homogeneous solvents and cyclodextrin nanocavities: a spectroscopic exploration appended by quantum chemical calculations and molecular docking analysis
Source: Royal Society of Chemistry journal article supplement (doi:10.1039/c3ra40749g), 2013-01-01
Supplement: c3ra40749g.pdf [file c3ra40749g.pdf]

**Electronic supplementary information for the RSC Advances paper**

**Probing the Spectral Response of a New Class of Bio-Active Pyrazoline  
Derivative in Homogeneous Solvents and Cyclodextrin Nanocavities: A  
Spectroscopic Exploration Appended by Quantum Chemical Calculation and  
Molecular Docking Analysis**

*Soumya Sundar Mati*<sup>a</sup>, *Sunandan Sarkar*<sup>b</sup>, *Soumyadipta Rakshit*<sup>a</sup>, *Arindam  
Sarkar*<sup>a</sup> and *Subhash Chandra Bhattacharya*<sup>\*a</sup>

<sup>a</sup>Department of Chemistry, Jadavpur University, Kolkata 700032, India.

\*e-mail: sbjuchem@yahoo.com, scbhattacharyya@chemistry.jdvu.ac.in

Phone No: 033 2414 6223 / Fax: 91(033) 24146584

<sup>b</sup>Department of Chemistry, Visva-Bharati University, Santiniketan-731235, India.

**Fig. S1** Plot of Stokes shift ( $\Delta\bar{\nu}$ ) vs.  $E_T(30)$  for PZ in different homogeneous solvents.

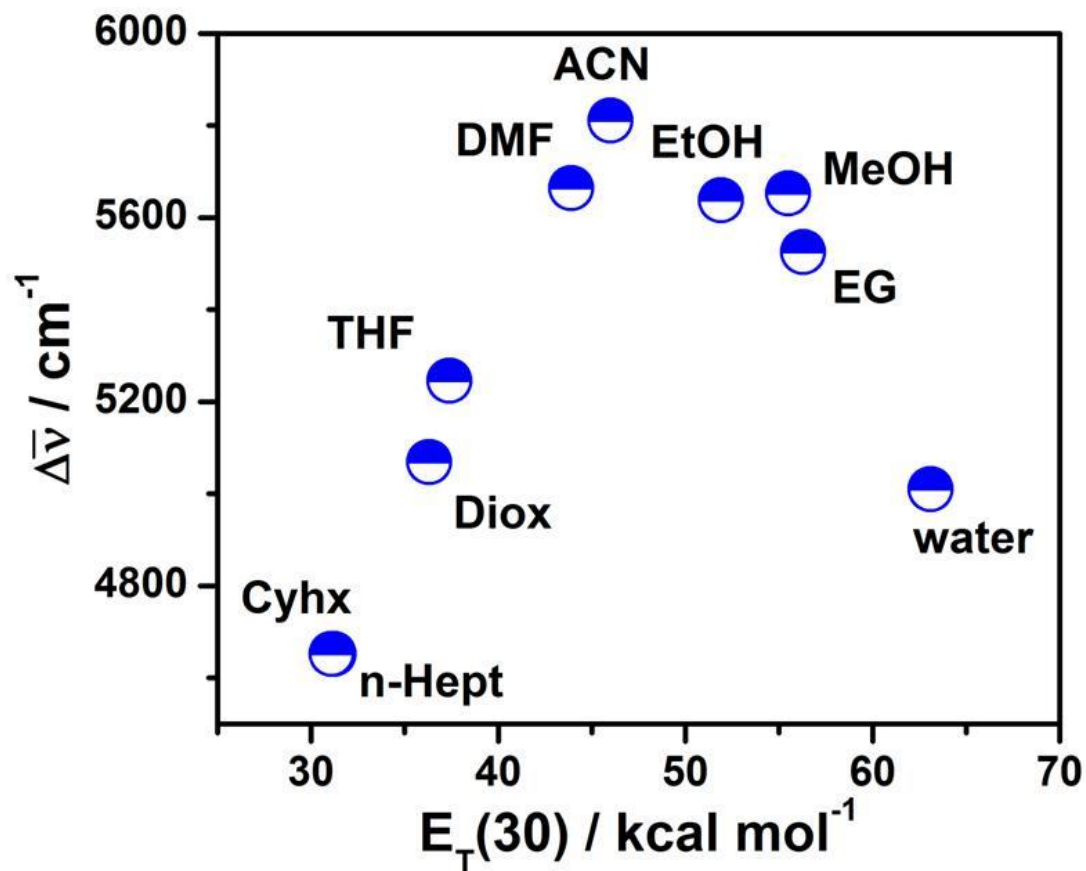

**Fig. S2** Variation of  $F/F_0$  for PZ with concentration of cyclodextrin.

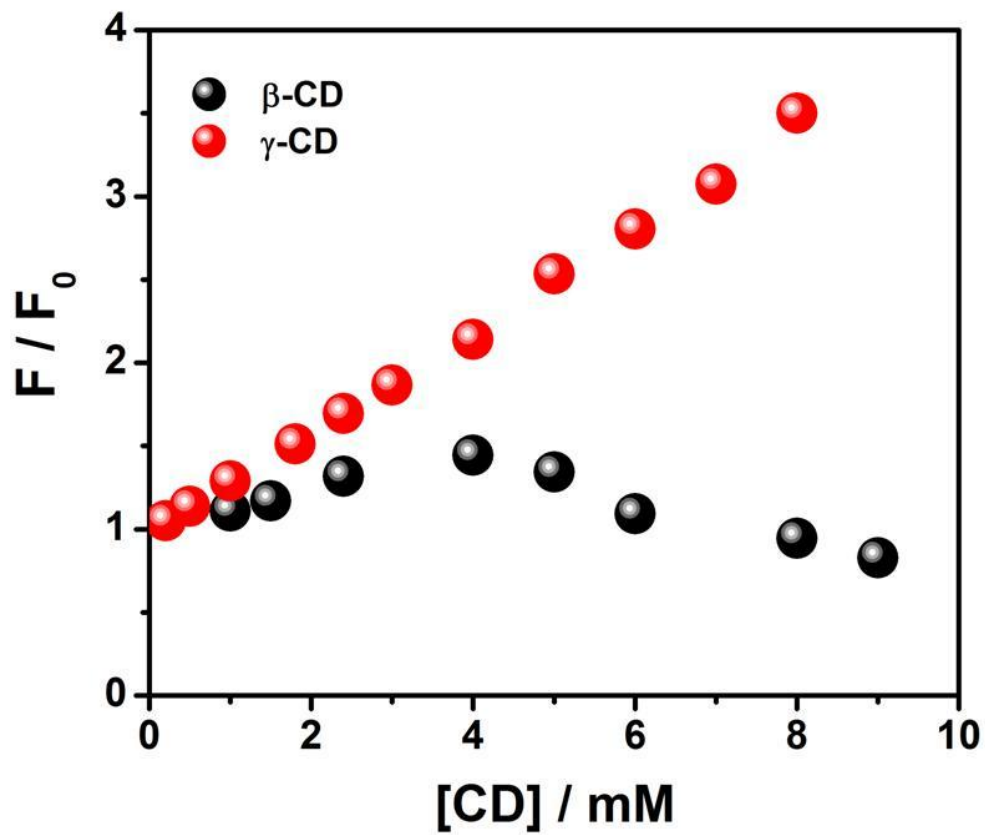

**Fig. S3** Plot of  $\log(k_{nr}/k_r)$  vs.  $E_T(30)$  for PZ in different homogeneous solvents.

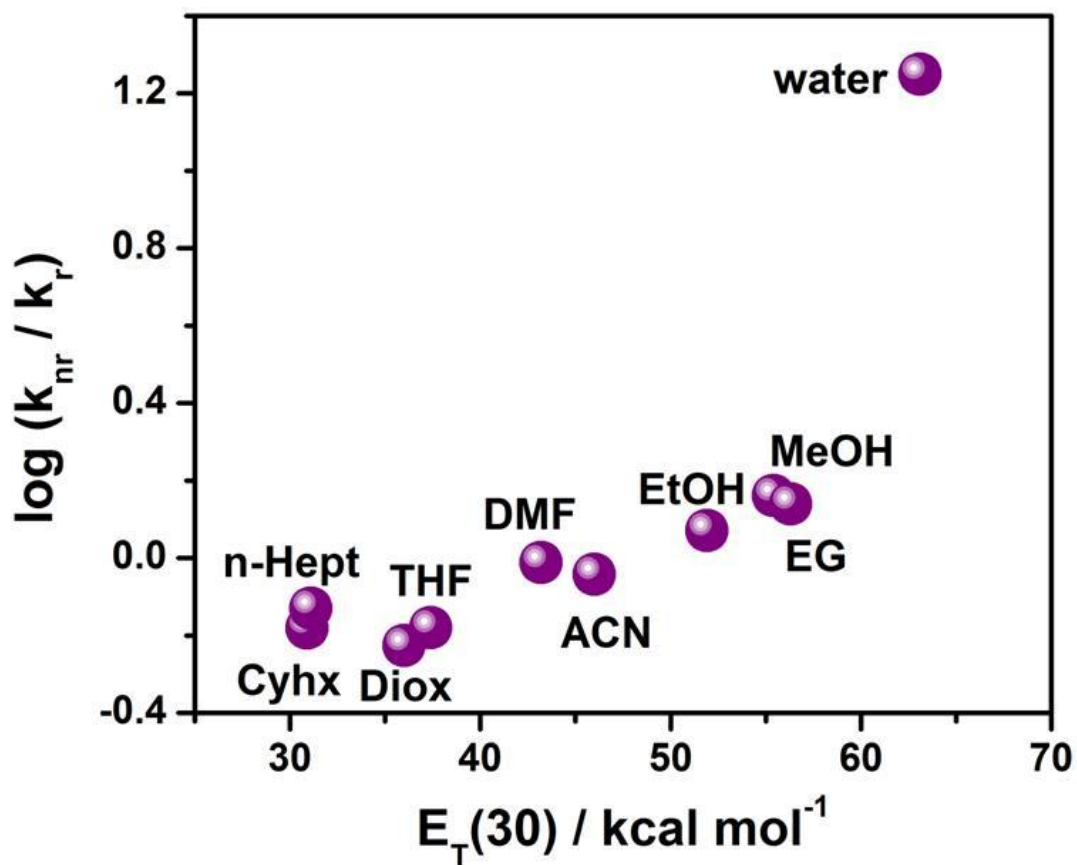

**Table ST 1:** Variation of Quantum yield in different % of Diox-water mixture

| <b>% of Diox in<br/>Diox-water<br/>mixture</b> | <b>Quantum<br/>yield</b> |
|------------------------------------------------|--------------------------|
| 0                                              | 0.03                     |
| 10                                             | 0.17                     |
| 20                                             | 0.24                     |
| 30                                             | 0.30                     |
| 40                                             | 0.34                     |
| 50                                             | 0.39                     |
| 60                                             | 0.42                     |
| 70                                             | 0.48                     |
| 80                                             | 0.54                     |
| 90                                             | 0.60                     |
| 100                                            | 0.63                     |

**Table ST 2:** Variation of Wavelength of PZ upon addition of cyclodextrin in different concentration

| <b>Beta-cyclodextrin</b> |                 | <b>Gama-cyclodextrin</b> |                 |
|--------------------------|-----------------|--------------------------|-----------------|
| Concentration (mM)       | Wavelength (nm) | Concentration (mM)       | Wavelength (nm) |
| 0.0                      | 494             | 0.0                      | 494             |
| 1.0                      | 487             | 0.2                      | 493             |
| 2.4                      | 480             | 0.5                      | 492             |
| 4.0                      | 478             | 1.0                      | 488             |
| 5.0                      | 476             | 1.8                      | 487             |
| 6.0                      | 475             | 2.4                      | 486             |
| 8.0                      | 474             | 3.0                      | 485             |
| 9.0                      | 474             | 4.0                      | 482             |
|                          |                 | 5.0                      | 481             |
|                          |                 | 6.0                      | 480             |
|                          |                 | 7.0                      | 478             |
|                          |                 | 8.0                      | 478             |
